# Supplementary material for: Mo-doped PdCu nanoparticles as high-performance catalysts for oxygen reduction reactions
Source: Royal Society of Chemistry journal article supplement (doi:10.1039/d3dt02773b), 2023-01-01
Supplement: d3dt02773b1.pdf [file d3dt02773b1.pdf]

## Supporting information

# Mo-doped PdCu Nanoparticles as High-Performance Catalysts for Oxygen Reduction Reaction

*Kailu Kang,<sup>a</sup> Xing Hu,<sup>a</sup> Pei Zhang,<sup>a</sup> Yangyang Zhang,<sup>a</sup> Shan Zhu,<sup>a</sup> Kaixiang Lei,<sup>a</sup> Kezhu Jiang\*<sup>a</sup> and Shijian Zheng\*<sup>a b</sup>*

<sup>a</sup> Technology, School of Materials Science and Engineering, Hebei University of Technology.

Tianjin 300401, China

<sup>b</sup> Tianjin Key Laboratory of Materials Laminating Fabrication and Interface Control Technology. Tianjin 300401, China

## 1: Supplementary Figures

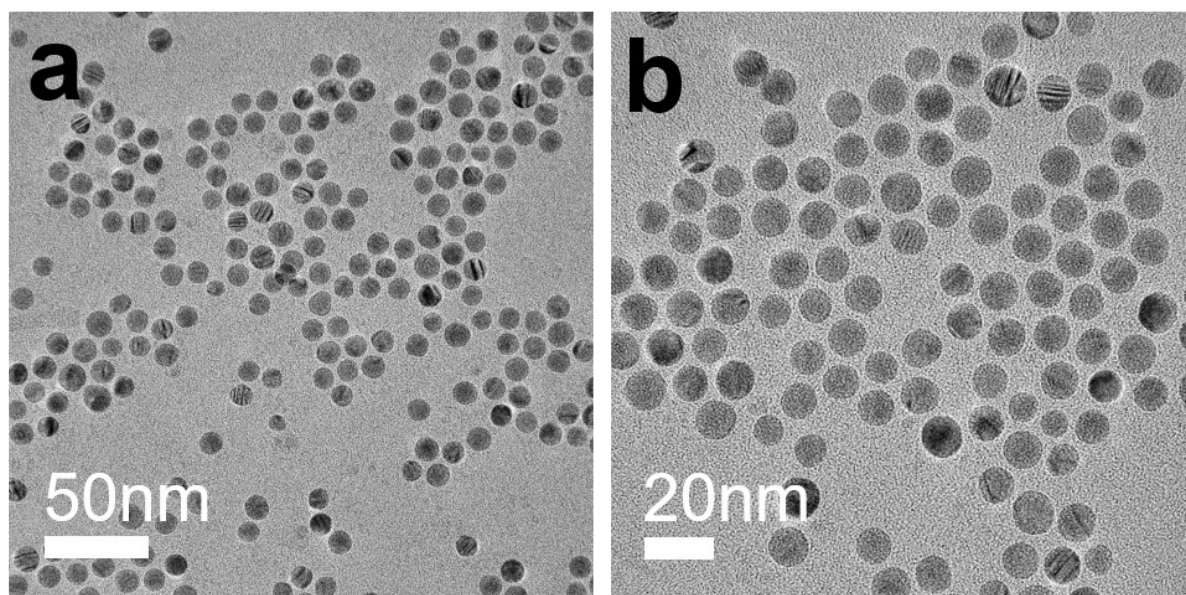

**Figure S1.** TEM images of Mo-PdCu-1 NPs. (a) low-magnification TEM image and (b) high-magnification TEM image of Mo-PdCu-1 NPs.

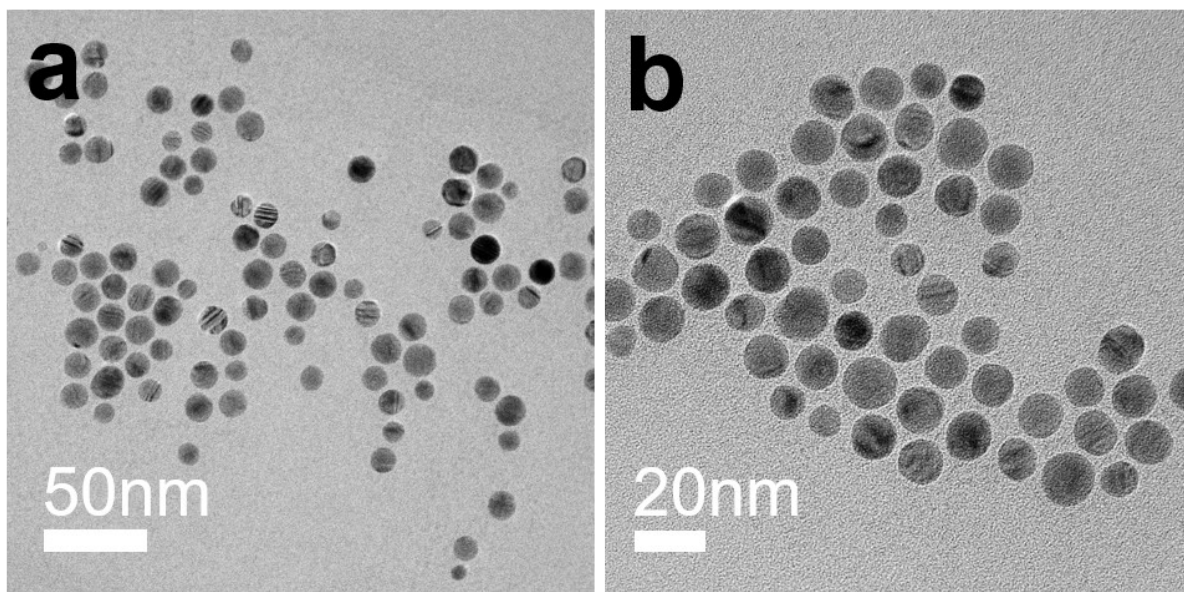

**Figure S2.** TEM images of Mo-PdCu-2 NPs. (a) low-magnification TEM and (b) high-magnification TEM images of Mo-PdCu-2 NPs.

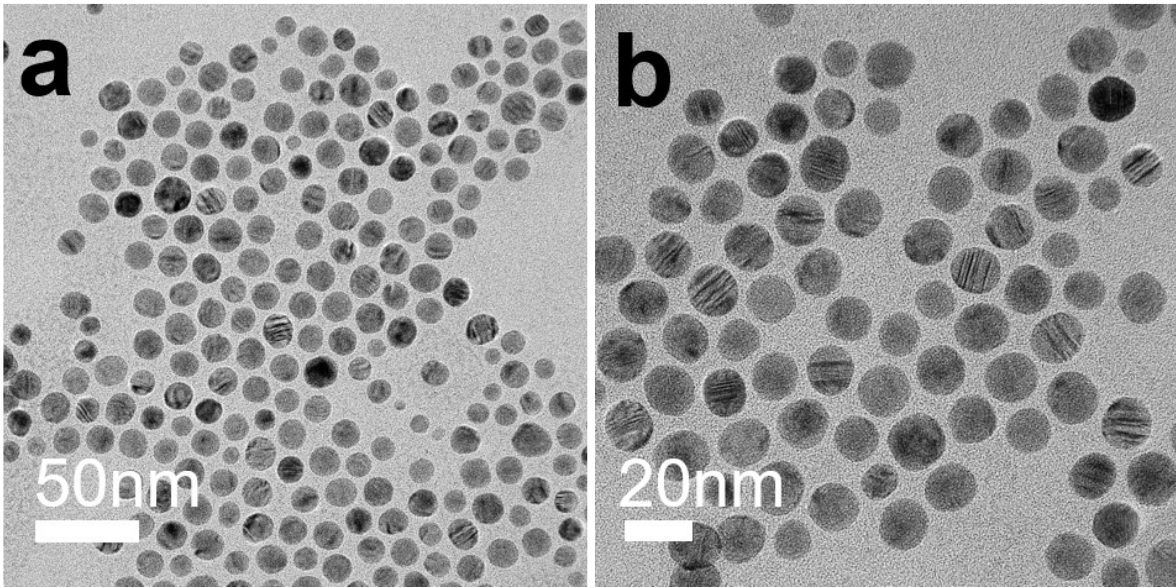

**Figure S3.** TEM images of Mo-PdCu-3 NPs. (a) low-magnification and (b) high-magnification TEM images of Mo-PdCu-3 NPs.

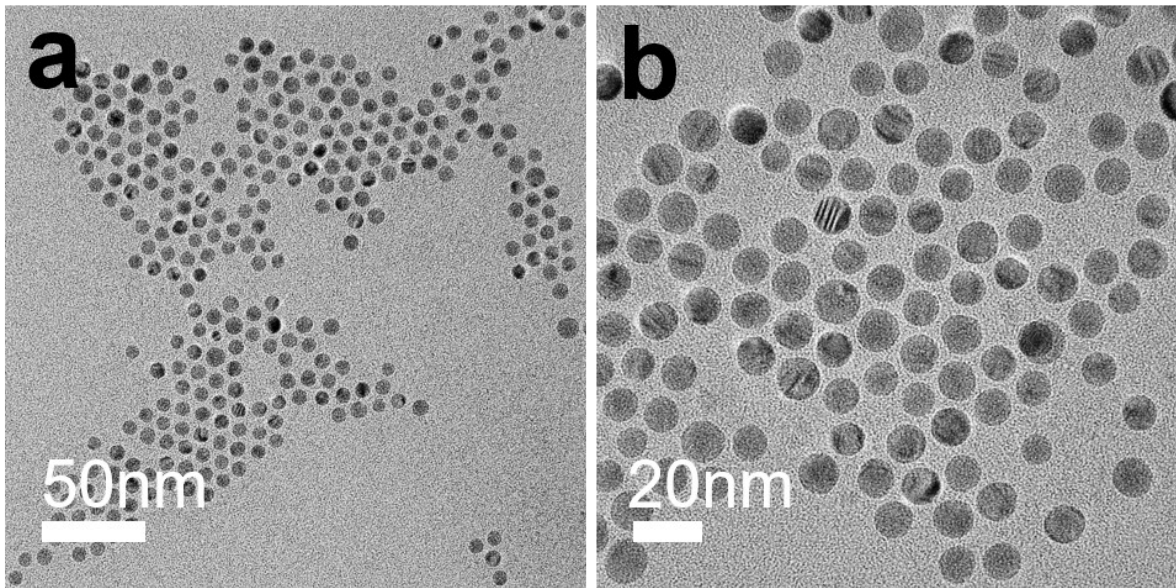

**Figure S4.** TEM images of PdCu NPs. (a) low-magnification TEM image, (b) high-magnification TEM image and (c)XRD pattern of PdCu NPs.

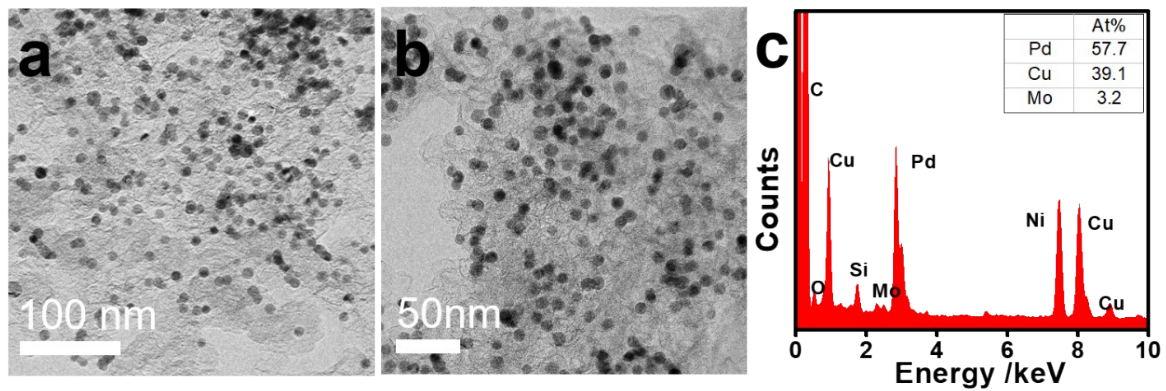

**Figure S5.** The morphology and composition characterization of Mo-PdCu-1/C. (a, b) TEM images and (c) STEM EDS pattern of Mo-PdCu-1/C.

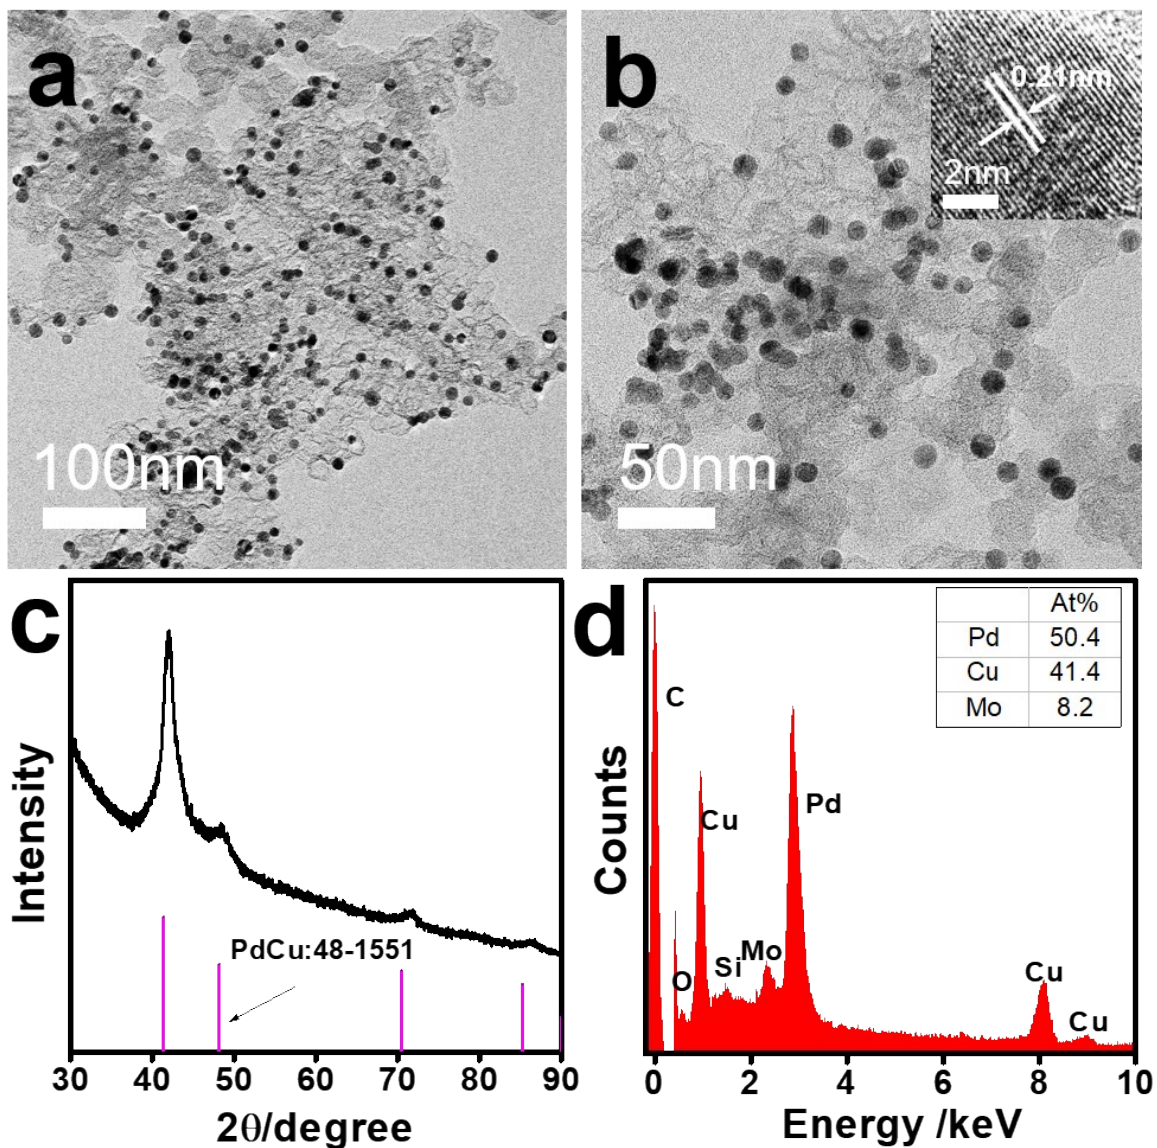

**Figure S6.** The morphology, composition and structure characterization of Mo-PdCu-2/C. (a, b) TEM images, (c) XRD pattern and (d) SEM-EDS pattern of Mo-PdCu-2/C. The inset: HRTEM image of Mo-PdCu-2/C.

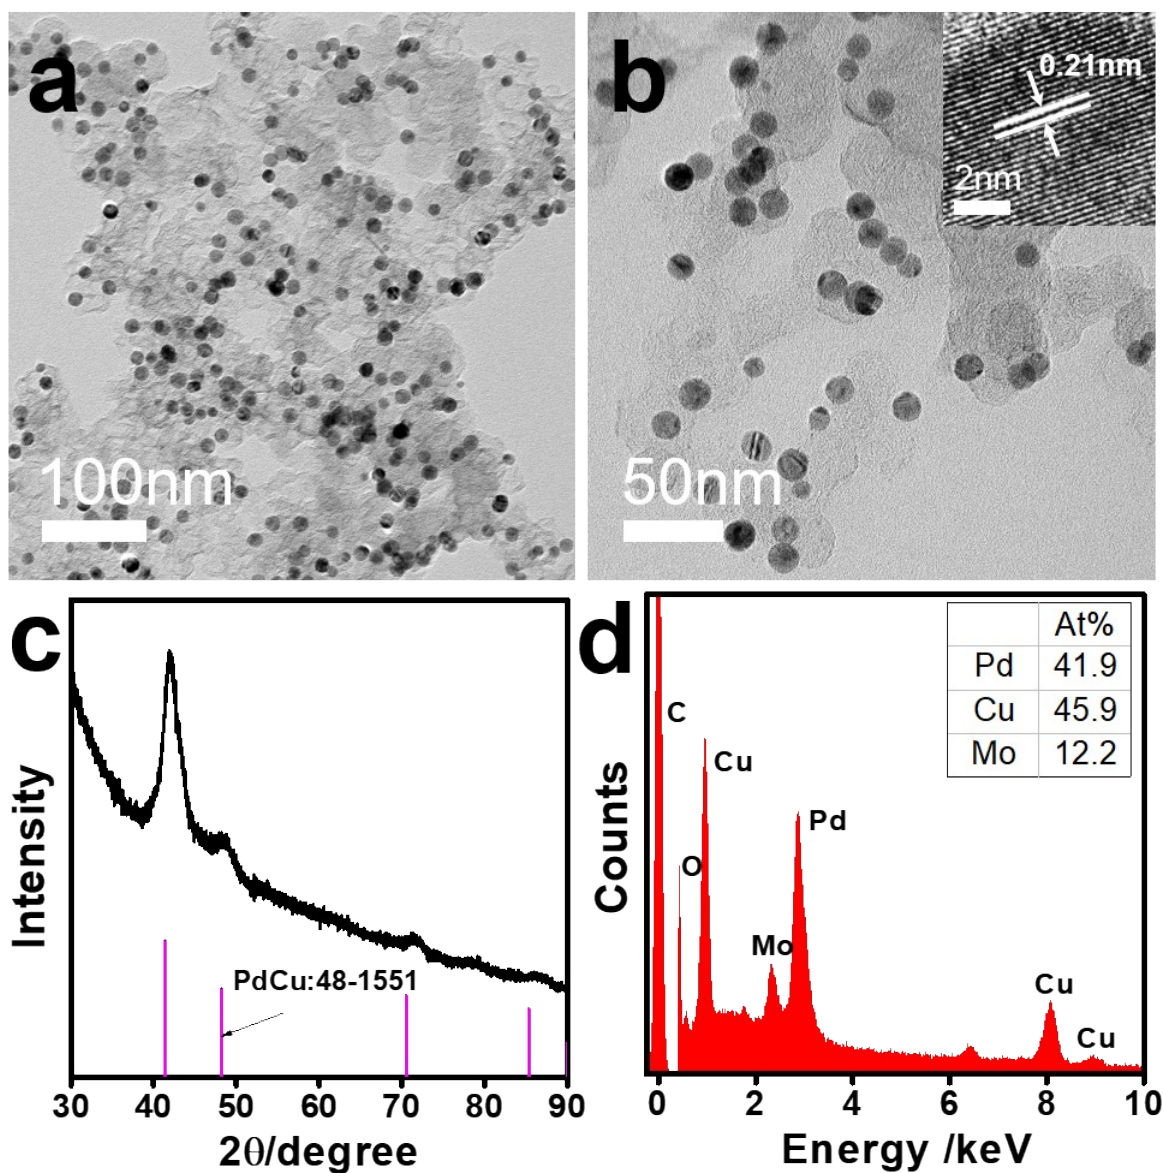

**Figure S7.** The morphology, composition and structure characterization of Mo-PdCu-3/C. (a, b) TEM images, (c) XRD pattern and (d) SEM-EDS pattern of Mo-PdCu-3/C. The inset: HRTEM image of Mo-PdCu-3/C.



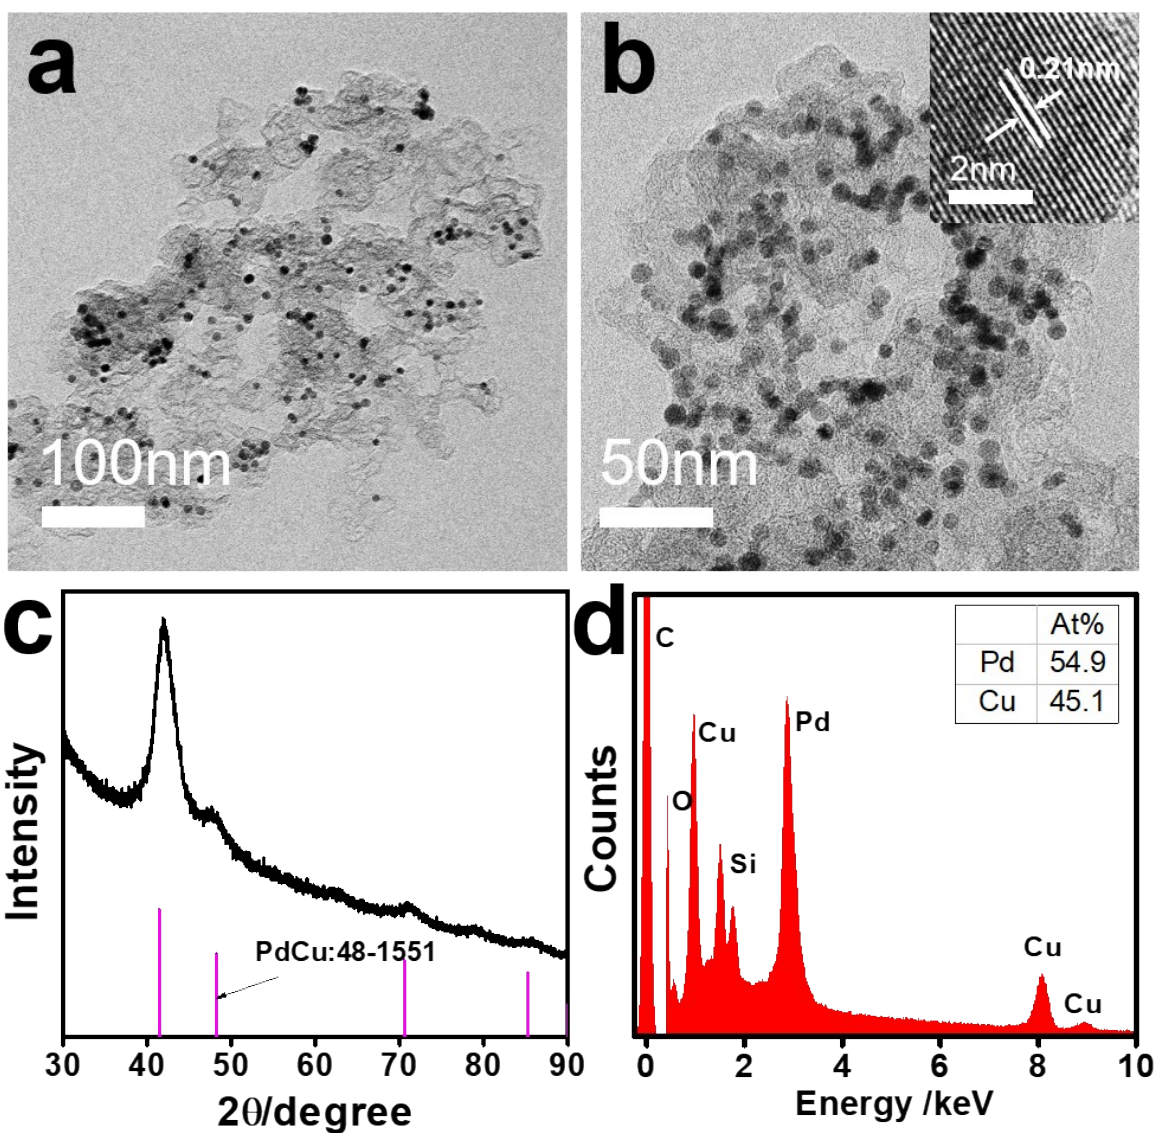

**Figure S8.** The morphology, composition and structure characterization of PdCu/C. (a, b) TEM images, (c) XRD pattern and (d) SEM-EDS pattern of PdCu/C. The inset: HRTEM image of PdCu/C.

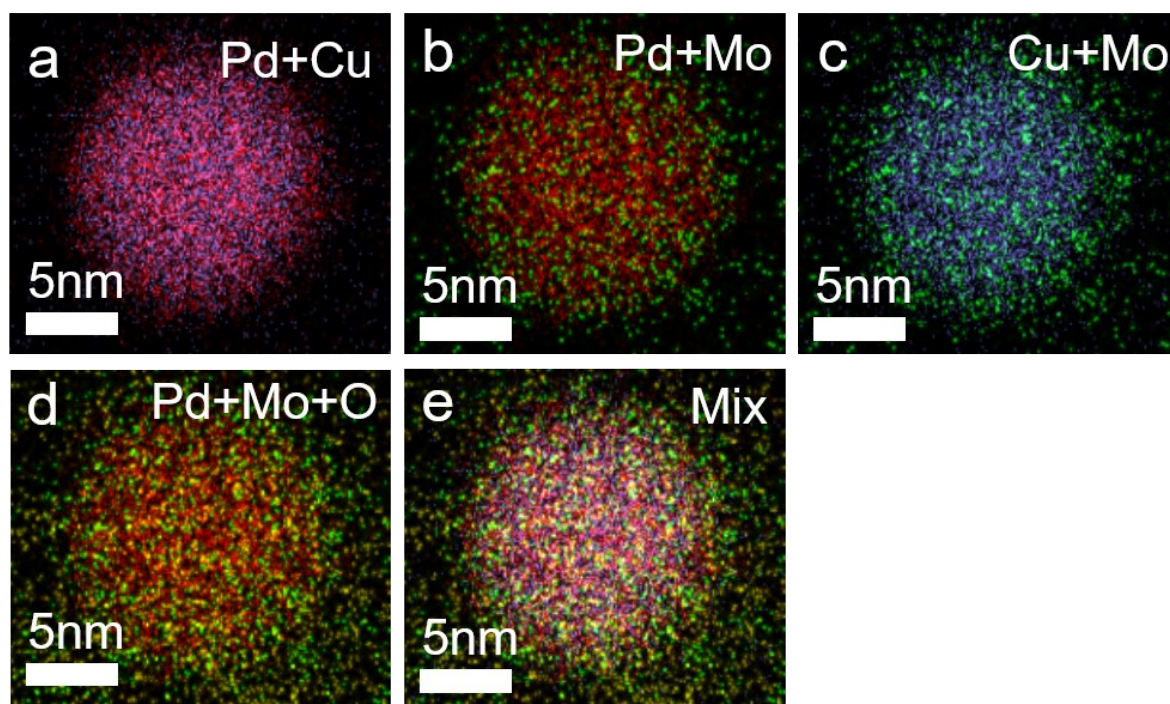

**Figure S9.** HAADF-STEM-EDS elemental mapping images of single Mo-PdCu-1/C.

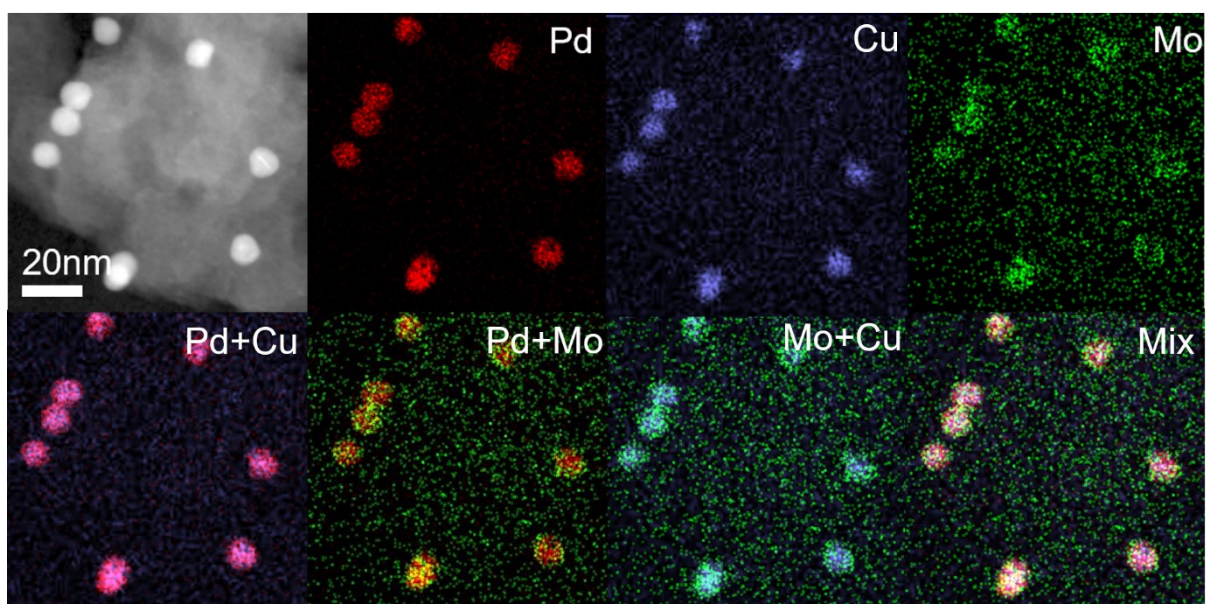

**Figure S10.** HAADF-STEM-EDS elemental mapping images of Mo-PdCu-1/C.

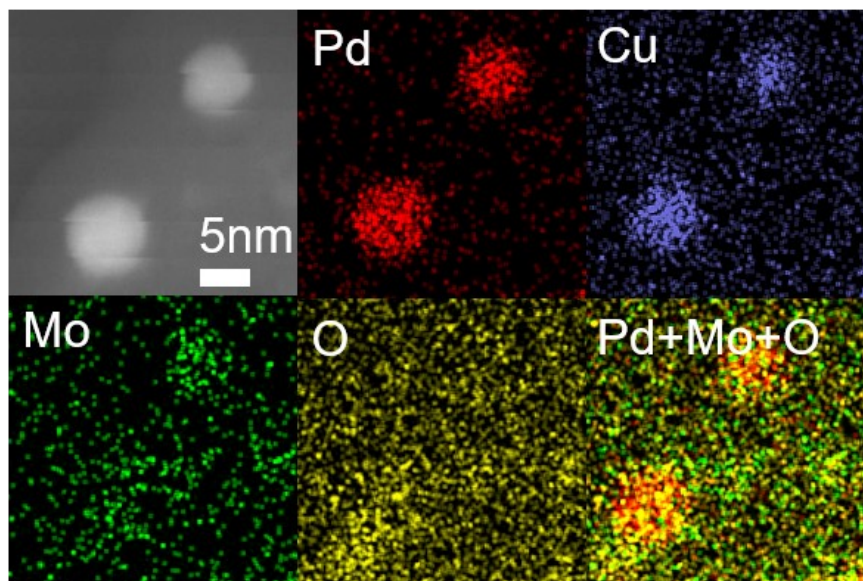

**Figure S11.** HAADF-STEM-EDS elemental mapping images of Mo-PdCu-2/C.

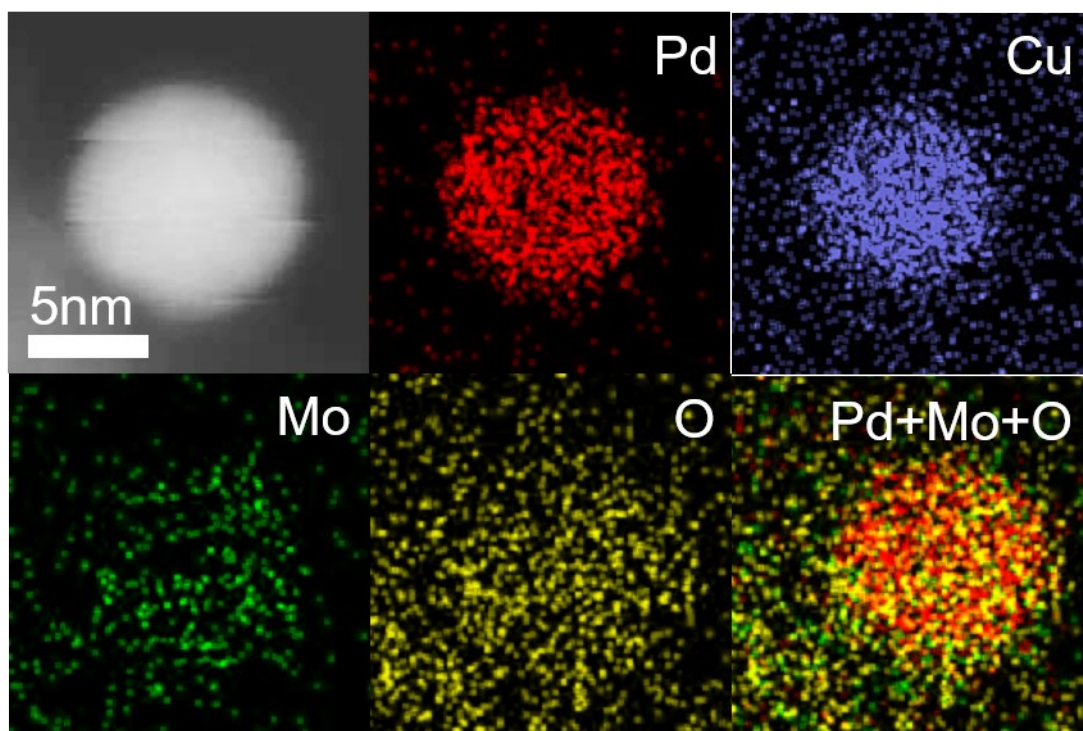

**Figure S12.** HAADF-STEM-EDS elemental mapping images of Mo-PdCu-3/C.

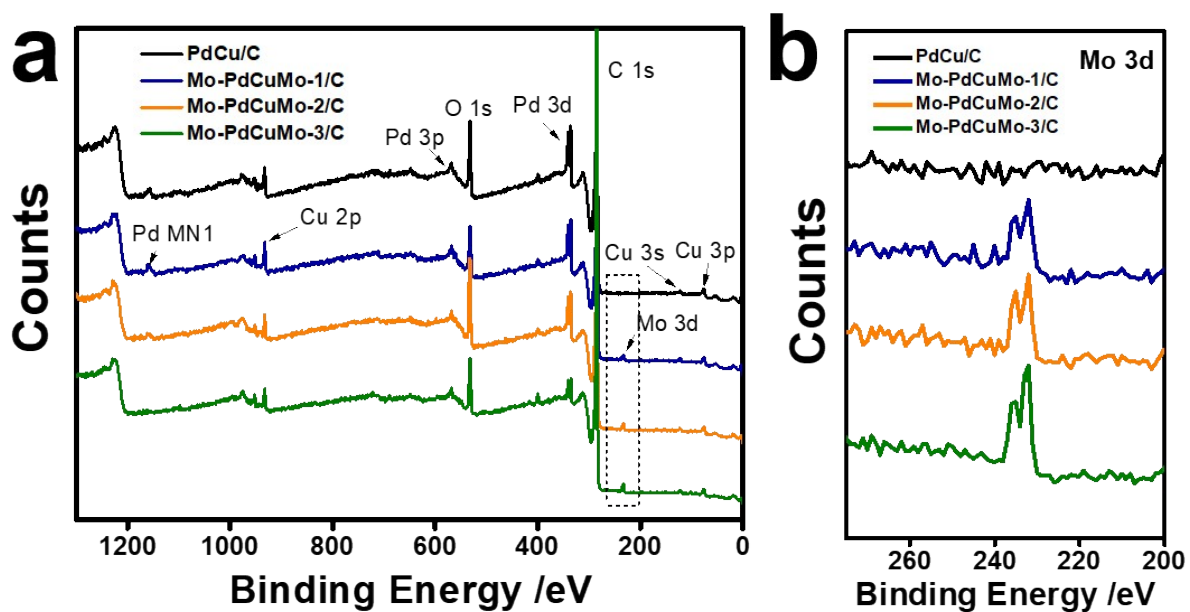

**Figure S13.** XPS spectra of the catalysts. (a) XPS whole pattern of PdCu/C, Mo-PdCu-1/C, Mo-PdCu-2/C, Mo-PdCu-3/C. (b) Partially enlarged pattern of (a).

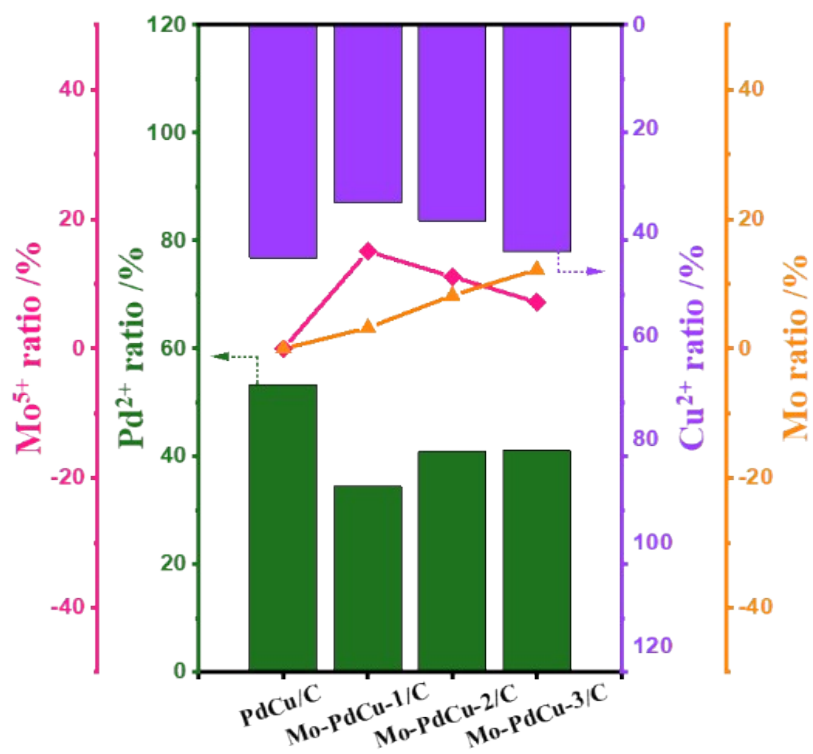

**Figure S14.** The ratio change of Mo, Mo<sup>5+</sup>, Pd<sup>2+</sup>, and Cu<sup>2+</sup> from XPS. Among them, Mo, Mo<sup>5+</sup>, Pd<sup>2+</sup>, and Cu<sup>2+</sup> correspond to orange, pink, green, and purple, respectively.

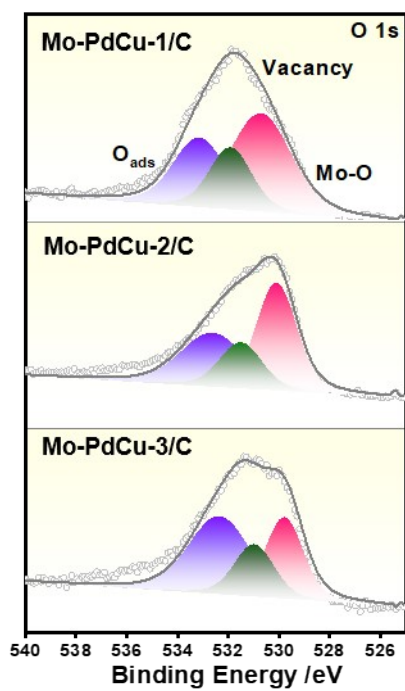

**Figure S15.** O 1s XPS patterns of Mo-PdCu-1/C, Mo-PdCu-2/C, and Mo-PdCu-3/C.



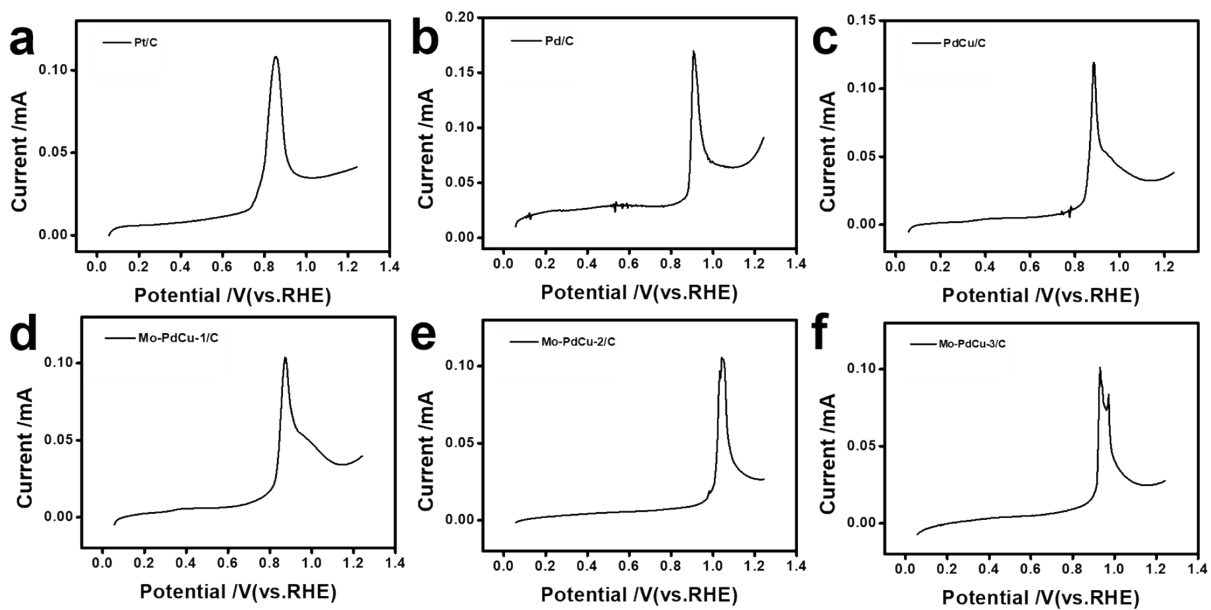

**Figure S16.** CO stripping curves in CO-saturated 0.1 M HClO<sub>4</sub> solution. (a) Pt/C, (b) Pd/C, (c) PdCu/C, (d) Mo-PdCu-1/C, (e) Mo-PdCu-2/C and (f) Mo-PdCu-3/C.

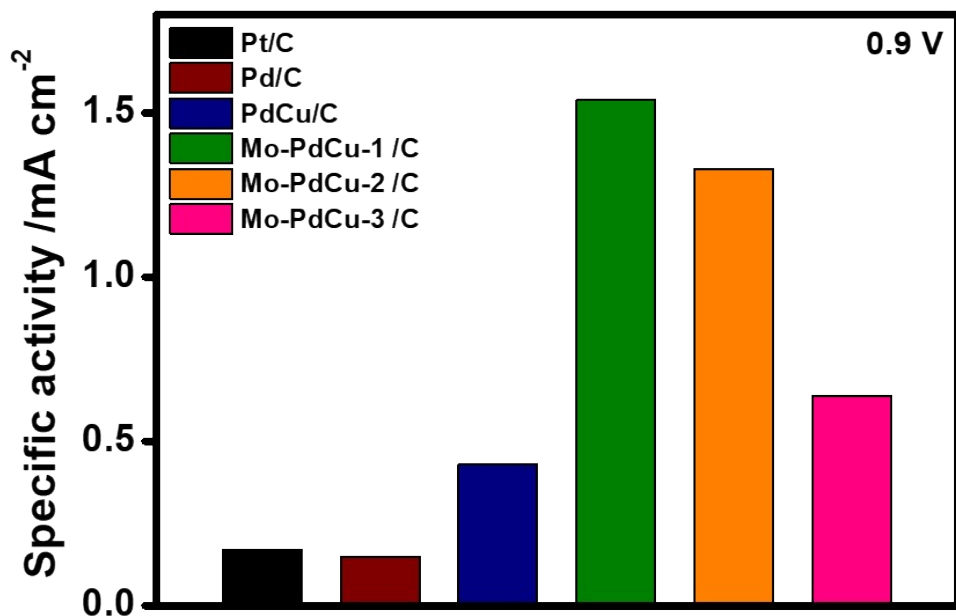

**Figure S17.** Specific activity of Pt/C, Pd/C, PdCu/C, Mo-PdCu-1/C, Mo-PdCu-2/C and Mo-PdCu-3/C.

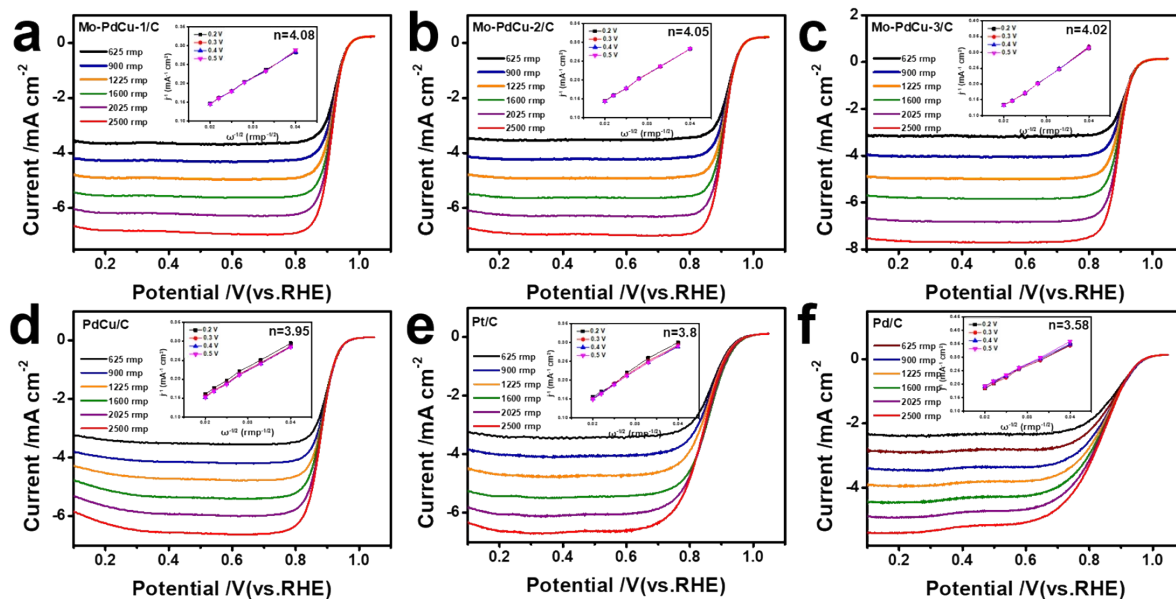

**Figure S18.** The rotating disk electrode plots of the catalysts. Spectrum of (a) Mo-PdCu-1/C, (b) Mo-PdCu-2/C, (c) Mo-PdCu-3/C, (d) PdCu/C, (e) Pt/C and (f) Pd/C in oxygen-saturated 0.1 M NaOH at rotation speeds ranging from 625 to 2,500 rpm and a scan rate of 10 mV s<sup>-1</sup>; inset K-L curves.

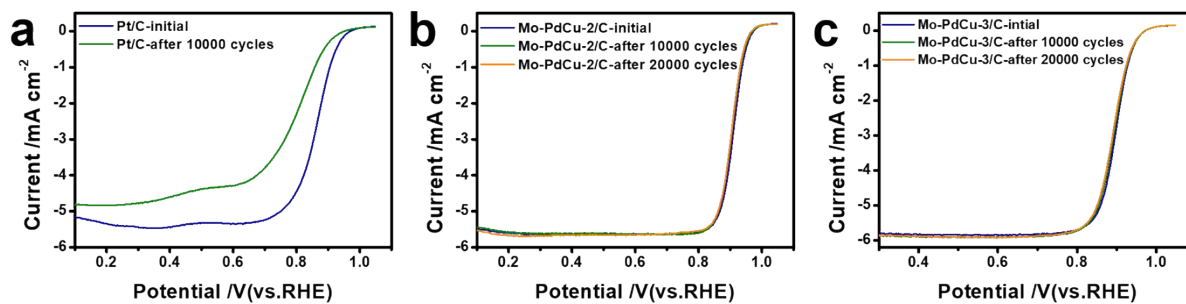

**Figure S19.** ORR stability of the catalyst. ORR polarization curves for (a) Pt/C, (b) Mo-PdCu-2/C, and (c) Mo-PdCu-3/C before and after cycles of ADT-O<sub>2</sub> in O<sub>2</sub>-saturated 0.1 M NaOH solution.

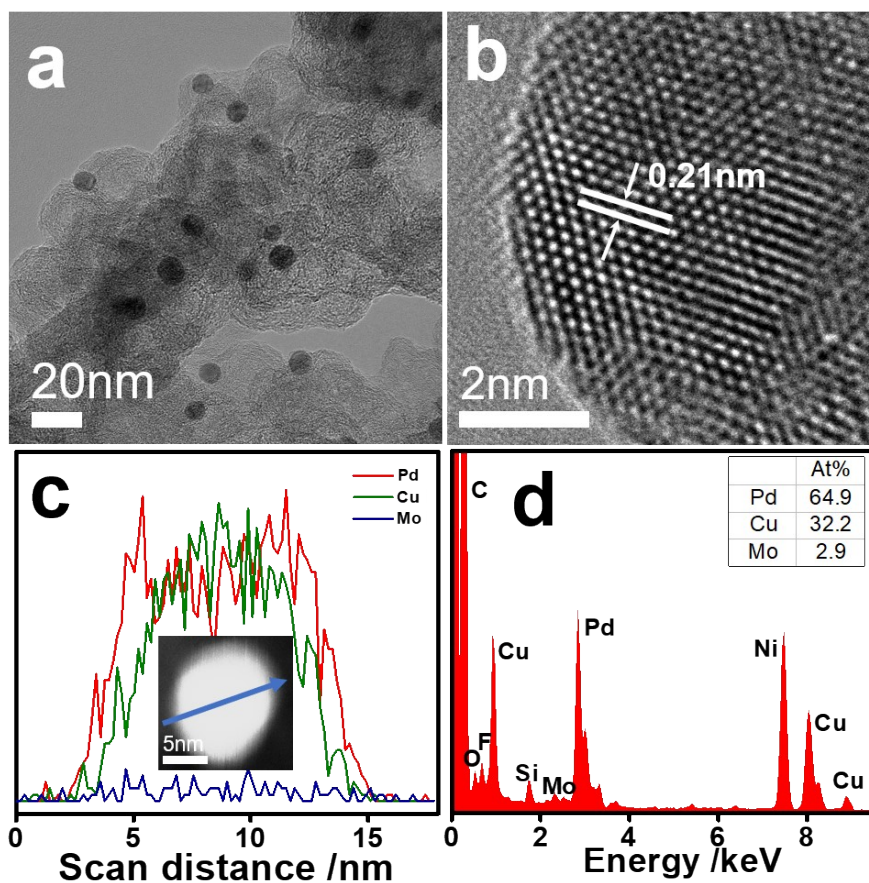

**Figure S20.** The morphology and element characterization of Mo-PdCu-1/C after stability test. (a) Representative TEM image, (b) HRTEM image, (c) HAADF-STEM-EDS elemental line scans, and (d) STEM-EDS pattern of Mo-PdCu-1/C after 20,000 cycles ADT-O<sub>2</sub> in O<sub>2</sub>-saturated 0.1 M NaOH solution.

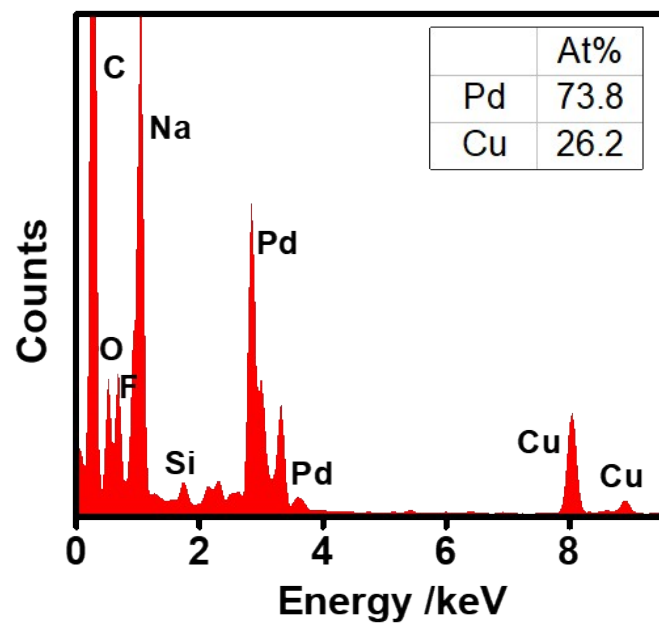

**Figure S21.** STEM-EDS pattern of PdCu/C after ORR 10000 cycles ADT-O<sub>2</sub> in O<sub>2</sub>-saturated 0.1 M NaOH solution.

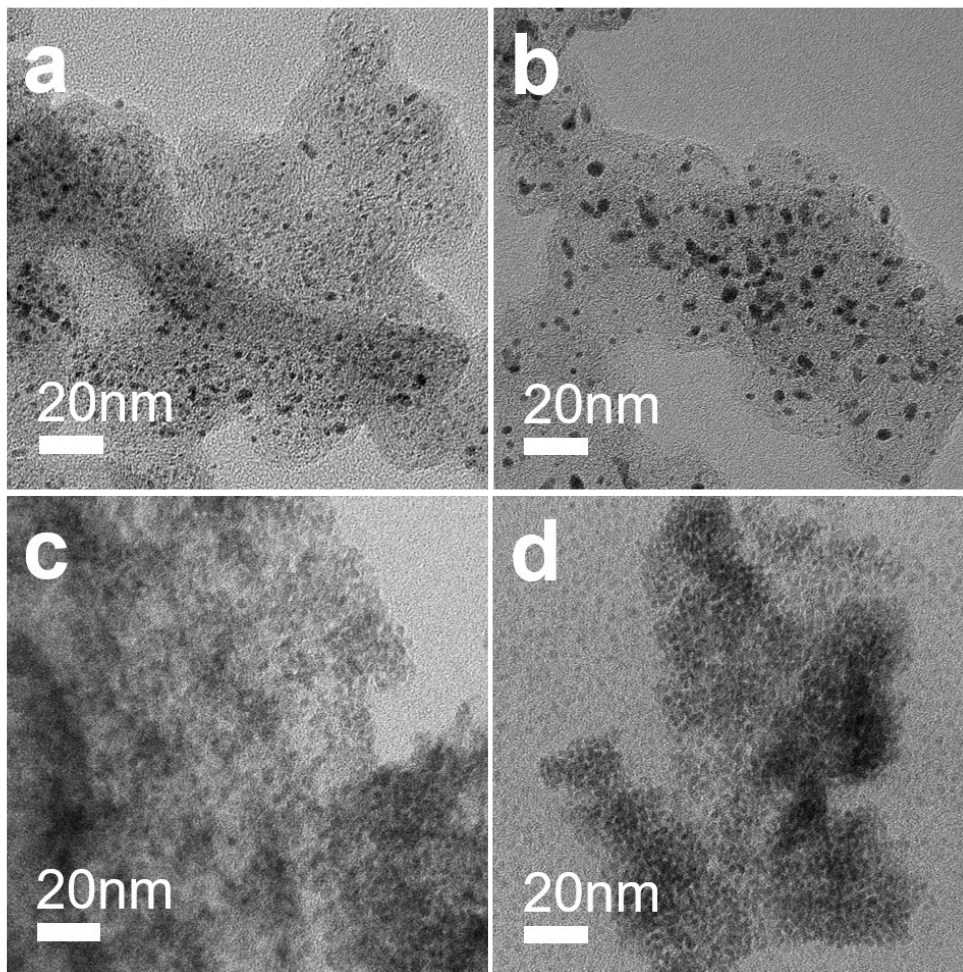

**Figure S22.** The TEM images of Pt/C and Pd/C after stability test. Representative TEM images of Pt/C and Pd/C (a, d) before and (c, f) after ORR 10,000 cycles ADT-O<sub>2</sub> in O<sub>2</sub>-saturated 0.1 M NaOH solution.

## 2: Supplementary Table

**Table S1.** Summary of elemental percentages of different catalysts from EDS, XPS, and ICP.

|     |    | <b>Mo-PdCu-1/C</b> | <b>Mo-PdCu-2/C</b> | <b>Mo-PdCu-3/C</b> | <b>PdCu/C</b> |
|-----|----|--------------------|--------------------|--------------------|---------------|
| EDS | Pd | 57.7               | 50.4               | 41.9               | 54.9          |
|     | Cu | 39.1               | 42.4               | 45.9               | 45.1          |
|     | Mo | 3.2                | 8.2                | 12.2               |               |
| XPS | Pd | 62.6               | 56.4               | 53.5               | 51.4          |
|     | Cu | 29.1               | 33.3               | 32.4               | 48.6          |
|     | Mo | 8.3                | 10.3               | 14.1               |               |
| ICP | Pd | 41.9               | 35.5               | 37.7               | 48.2          |
|     | Cu | 53.2               | 55.9               | 51.4               | 51.8          |
|     | Mo | 4.9                | 8.6                | 10.9               |               |



**Table S2.** Summary of elemental valence percentages of different catalysts from XPS.

|           |                  | <b>PdCu/C</b> | <b>Mo-PdCu-1/C</b> | <b>Mo-PdCu-2/C</b> | <b>Mo-PdCu-3/C</b> |
|-----------|------------------|---------------|--------------------|--------------------|--------------------|
| <b>Pd</b> | +2               | 53.34%        | 34.42%             | 40.90%             | 41.12%             |
|           | 0                | 45.66%        | 65.58%             | 59.10%             | 58.88%             |
| <b>Cu</b> | +2               | 45.00%        | 34.30%             | 37.81%             | 43.80%             |
|           | 0                | 55.00%        | 65.70%             | 62.19%             | 56.20%             |
| <b>Mo</b> | +6               |               | 85.00%             | 88.90%             | 92.84%             |
|           | +5               |               | 15.00%             | 11.10%             | 7.17%              |
|           | Vacanc           |               | 21.48%             | 19.77%             | 18.37%             |
| <b>O</b>  | y                |               |                    |                    |                    |
|           | Mo-O             |               | 48.83%             | 43.25%             | 33.62%             |
|           | O <sub>ads</sub> |               | 29.68%             | 36.98%             | 48.01%             |

**Table S3.** Summary of ECSA of different catalysts from CO stripping curve (Unit is  $\text{m}^2 \text{g}^{-1}_{\text{Pd+Pt}}$ ).

|             | <b>Pt/C</b> | <b>Pd/C</b> | <b>PdCu/C</b> | <b>Mo-PdCu-1/C</b> | <b>Mo-PdCu-2/C</b> | <b>Mo-PdCu-3/C</b> |
|-------------|-------------|-------------|---------------|--------------------|--------------------|--------------------|
| <b>ECSA</b> | 69.49       | 59.07       | 54.85         | 78.19              | 62.24              | 58.32              |
